# Supplementary material for: The Effect of Sound Frequency and Intensity on Yeast Growth, Fermentation Performance and Volatile Composition of Beer
Source: Molecules. 2021 Nov 29;26(23):7239. doi: 10.3390/molecules26237239 (PMC8658799; doi:10.3390/molecules26237239)
Supplement: Supplementary file 1 [file molecules-26-07239-s001.zip › Adadi et al., 2021_supplementaryinfo_26112021.pdf]

Supplementary material

# The Effect of Sound Frequency and Intensity on Yeast Growth, Fermentation Performance and Volatile Composition of Beer

Parise Adadi <sup>1</sup>, Alastair Harris <sup>2</sup>, Phil Bremer <sup>1</sup>, Patrick Silcock <sup>1</sup>, Austen R.D. Ganley <sup>2</sup>, Andrew G. Jeffs <sup>2,3</sup> and Graham T. Eyres <sup>1,\*</sup>

<sup>1</sup> Department of Food Science, University of Otago, P.O. Box 56, Dunedin 9054, New Zealand; parise.adadi@postgrad.otago.ac.nz (P.A.); phil.bremer@otago.ac.nz (P.B.); pat.silcock@otago.ac.nz (P.S.)

<sup>2</sup> School of Biological Sciences, University of Auckland, Auckland, 1142, New Zealand; ahar394@aucklanduni.ac.nz (A.H.); a.ganley@auckland.ac.nz (A.R.D.G.)

<sup>3</sup> Institute of Marine Science, University of Auckland, Private Bag, 92019 Auckland, New Zealand; a.jeffs@auckland.ac.nz (A.G.J.)

**Table S1.** Viable yeast numbers in suspension ( $\times 10^6$  cells/mL) during fermentation for five treatment conditions.

| Sampling time<br>(h) | LF_LI<br>( $\times 10^6$ cells/mL) | LF_HI<br>( $\times 10^6$ cells/mL) | HF_LI<br>( $\times 10^6$ cells/mL) | HF_HI<br>( $\times 10^6$ cells/mL) | S<br>( $\times 10^6$ cells/mL) |
|----------------------|------------------------------------|------------------------------------|------------------------------------|------------------------------------|--------------------------------|
| 0                    | 9.10 (0.22) <sup>cA</sup>          | 9.10 (0.22) <sup>cA</sup>          | 9.10 (0.22) <sup>cA</sup>          | 9.10 (0.22) <sup>cA</sup>          | 9.10 (0.22) <sup>dA</sup>      |
| 10                   | 16.88 (2.27) <sup>bA</sup>         | 16.71 (2.48) <sup>bA</sup>         | 18.31 (4.09) <sup>bA</sup>         | 18.78 (2.15) <sup>bA</sup>         | 21.88 (2.49) <sup>bB</sup>     |
| 24                   | 35.31 (1.00) <sup>aB</sup>         | 34.33 (4.11) <sup>aB</sup>         | 34.86 (2.90) <sup>aB</sup>         | 38.98 (3.64) <sup>aAB</sup>        | 44.05 (1.58) <sup>aA</sup>     |
| 48                   | 13.22 (1.01) <sup>bcA</sup>        | 15.67 (3.12) <sup>bcA</sup>        | 12.05 (2.36) <sup>cA</sup>         | 12.76 (1.67) <sup>cA</sup>         | 14.47 (1.75) <sup>cA</sup>     |
| 72                   | 11.50 (4.44) <sup>cA</sup>         | 9.60 (3.42) <sup>cA</sup>          | 8.43 (1.98) <sup>cA</sup>          | 9.26 (2.15) <sup>cA</sup>          | 8.33 (0.95) <sup>dA</sup>      |
| 96                   | 1.71 (0.46) <sup>dA</sup>          | 2.02 (0.46) <sup>dA</sup>          | 2.07 (0.88) <sup>dA</sup>          | 1.74 (0.09) <sup>dA</sup>          | 1.81 (0.40) <sup>eA</sup>      |
| 120                  | 1.50 (0.61) <sup>dA</sup>          | 1.17 (0.15) <sup>dA</sup>          | 1.09 (0.41) <sup>dA</sup>          | 0.95 (0.29) <sup>dA</sup>          | 1.14 (0.57) <sup>eA</sup>      |
| 144                  | 0.48 (0.11) <sup>dA</sup>          | 0.57 (0.31) <sup>dA</sup>          | 0.38 (0.23) <sup>dA</sup>          | 0.67 (0.21) <sup>dA</sup>          | 0.79 (0.37) <sup>eA</sup>      |

Low-frequency and low intensity (LF\_LI); low-frequency and high-intensity (LF\_HI); high-frequency and low-intensity (HF\_LI); high-frequency and high-intensity (HF\_HI); silence (S). Data represented are the means ( $\pm$  SD) of three fermentation replicates. Means with different lower-case letters (subscripts) denote significant differences ( $p < 0.05$ ) in the same column (differences during fermentation time for the same treatment). Different capital letters (superscripts) denote significant differences ( $p < 0.05$ ) in the same row (differences between treatments at a given fermentation time).

**Table S2.** Wort gravity ( $^{\circ}$ P) during fermentation over time for five treatment conditions.

| Sampling time<br>(h) | LF_LI                      | LF_HI                      | HF_LI                      | HF_HI                      | S                          |
|----------------------|----------------------------|----------------------------|----------------------------|----------------------------|----------------------------|
| 0                    | 12.03 (0.06) <sup>aA</sup> |
| 10                   | 10.87 (0.06) <sup>bA</sup> | 10.87 (0.06) <sup>bA</sup> | 10.83 (0.06) <sup>bA</sup> | 10.77 (0.06) <sup>bA</sup> | 10.80 (0.10) <sup>bA</sup> |
| 24                   | 8.13 (0.06) <sup>cA</sup>  | 8.17 (0.12) <sup>cA</sup>  | 7.80 (0.10) <sup>cB</sup>  | 7.83 (0.06) <sup>cB</sup>  | 7.57 (0.15) <sup>cB</sup>  |
| 48                   | 3.93 (0.32) <sup>dAB</sup> | 4.10 (0.00) <sup>dA</sup>  | 3.73 (0.12) <sup>dAB</sup> | 3.53 (0.25) <sup>dAB</sup> | 3.20 (0.52) <sup>dB</sup>  |
| 72                   | 2.57 (0.21) <sup>eA</sup>  | 2.57 (0.12) <sup>eA</sup>  | 2.63 (0.06) <sup>eA</sup>  | 2.47 (0.06) <sup>eA</sup>  | 2.50 (0.17) <sup>eA</sup>  |
| 96                   | 2.30 (0.10) <sup>eA</sup>  | 2.23 (0.06) <sup>eA</sup>  | 2.33 (0.06) <sup>eA</sup>  | 2.30 (0.10) <sup>eA</sup>  | 2.30 (0.10) <sup>eA</sup>  |
| 120                  | 2.20 (0.00) <sup>eA</sup>  | 2.20 (0.00) <sup>eA</sup>  | 2.20 (0.00) <sup>eA</sup>  | 2.23 (0.06) <sup>eA</sup>  | 2.20 (0.00) <sup>eA</sup>  |
| 144                  | 2.20 (0.00) <sup>eA</sup>  | 2.20 (0.00) <sup>eA</sup>  | 2.20 (0.00) <sup>eA</sup>  | 2.17 (0.06) <sup>eA</sup>  | 2.17 (0.06) <sup>eA</sup>  |

Low-frequency and low intensity (LF\_LI); low-frequency and high-intensity (LF\_HI); high-frequency and low-intensity (HF\_LI); high-frequency and high-intensity (HF\_HI); silence (S). Data presented are the means ( $\pm$  SD) of three fermentation replicates. Means with different lower-case letters (subscripts) denote significant differences ( $p < 0.05$ ) in the same column (differences during fermentation time for the same treatment). Different capital letters (superscripts) indicate significant differences ( $p < 0.05$ ) in the same row (differences between treatments at a given fermentation time).

**Supplementary Data S1.** Bespoke MATLAB® scripts for sound generation.

```

Introduction='this script will produce noise within your specified frequency range,
plot the response curves and save the audio to the current folder in matlab'; Introduc-
tion

fs = input('please insert your required sampling rate = ');
Fp1 = input('what is your lowest frequency required?');
Fp2 = input('what is your highest frequency required?');
Ast1 = input('what max power do you want your noise floor to be =');
Ast2 = Ast1;
Ap = input('amount of ripple allowed in the pass band (set as 0.5 is unsure) =');
T = input('how long (seconds) do you want the audio to be?');
d1=fdesign.bandpass('Fst1,Fp1,Fp2,Fst2,Ast1,Ap,Ast2',Fp1-
50,Fp1,Fp2,Fp2+50,Ast1,Ap,Ast2,fs);
Hd1 = design(d1);
y1 = filter(Hd1,randn(fs*T,1));
fvtool(Hd1);    %this will just plot your magnitude for you to look at.

audiowrite('test.wav',y1,fs);%this is going to save the noise as a .wav file, saved to
the current folder in matlab.
                %you can change the filename to whatever,
                %but keep the ".wav" at the end.

```

**Audio S1.** Sound generated by Bespoke MATLAB® scripts (Supplementary Data 1) and saved as WAV. file (200-800 Hz; 800-2000 Hz (please see attached files “Audio files\_Adadi et al., 2021.wav”).

**Supplementary Data S2.** Bespoke MATLAB® scripts for calculating the mean level of sound intensity delivered before commencing fermentation. The blue arrow shows an uploaded recorded file ‘RO7\_0003.wav’ for analysis. The red bolded numbers are the hydrophone calibration numbers for input level 20 % (this varies according to individual hydrophone).

```

filename='RO7_0003.wav';
[dat,fs]=audioread(filename);
dat=dat(:,1);
n=1;

samr=fs;                % sampling rate
nstart=n*samr;          % starting point for plot/spectrum
nsam=fs;                % number of samples

tlo=4; tup=15;          % time window for plot - NB seconds

nlo=nstart+nsam*tlo+1;  % first data sample index

```

```

nup=nstart+nsam*tup;           % last data sample index

data=data(nlo:nup)';           % data segment for plot/spectrum
data=data*188516774.3;          % apply calibration
npts=length(data);             % number of points in data segment
tint=npts/samr;                 % time interval of data segment
t=tlo+(1:npts)/samr;           % time axis for plot

subplot(411);
plot(t,data);
%{
flo=20;           fhi=22000;

fdata=bpfilt(data,flo,fhi);

subplot(412);
plot(t,fdata);
%}

subplot(413);
pfdata=abs(data).^2;           % is Prms^2 of filtered data
smp=smooth(pfdata,5);
dbpd=10*log10(smp);            % converts into dB
plot(t,dbpd);
dbav=10*log10(sum(pfdata)/length(pfdata));
%axis([min(t),max(t),min(dbpd),max(dbpd)]);

spec=fft(data)/npts;           % fft of data segment NB Matlab fft drops 1/N
fnc=1/tint;                     % frequency increment in spectrum
nfreq=floor(npts/2);           % number of frequencies in spectrum
f=fnc*(0:nfreq-1)/1000;        % frequencies for plot - /1000 for kHz
pspec=abs(spec(1:nfreq)).^2;    % power spectrum
pspec=pspec/fnc;
dbspec=10*log10(pspec);

subplot(414);                   % spectrum of filtered data
smdbspec=10*log10(smooth(pspec,10));
semilogx(f,smdbspec);
axis([0.1,24,min(smdbspec),max(smdbspec)]);
%axis([0.1,24,-120,-20]);
title(['Mean level = ',num2str(dbav)]);
figure(gcf)

```

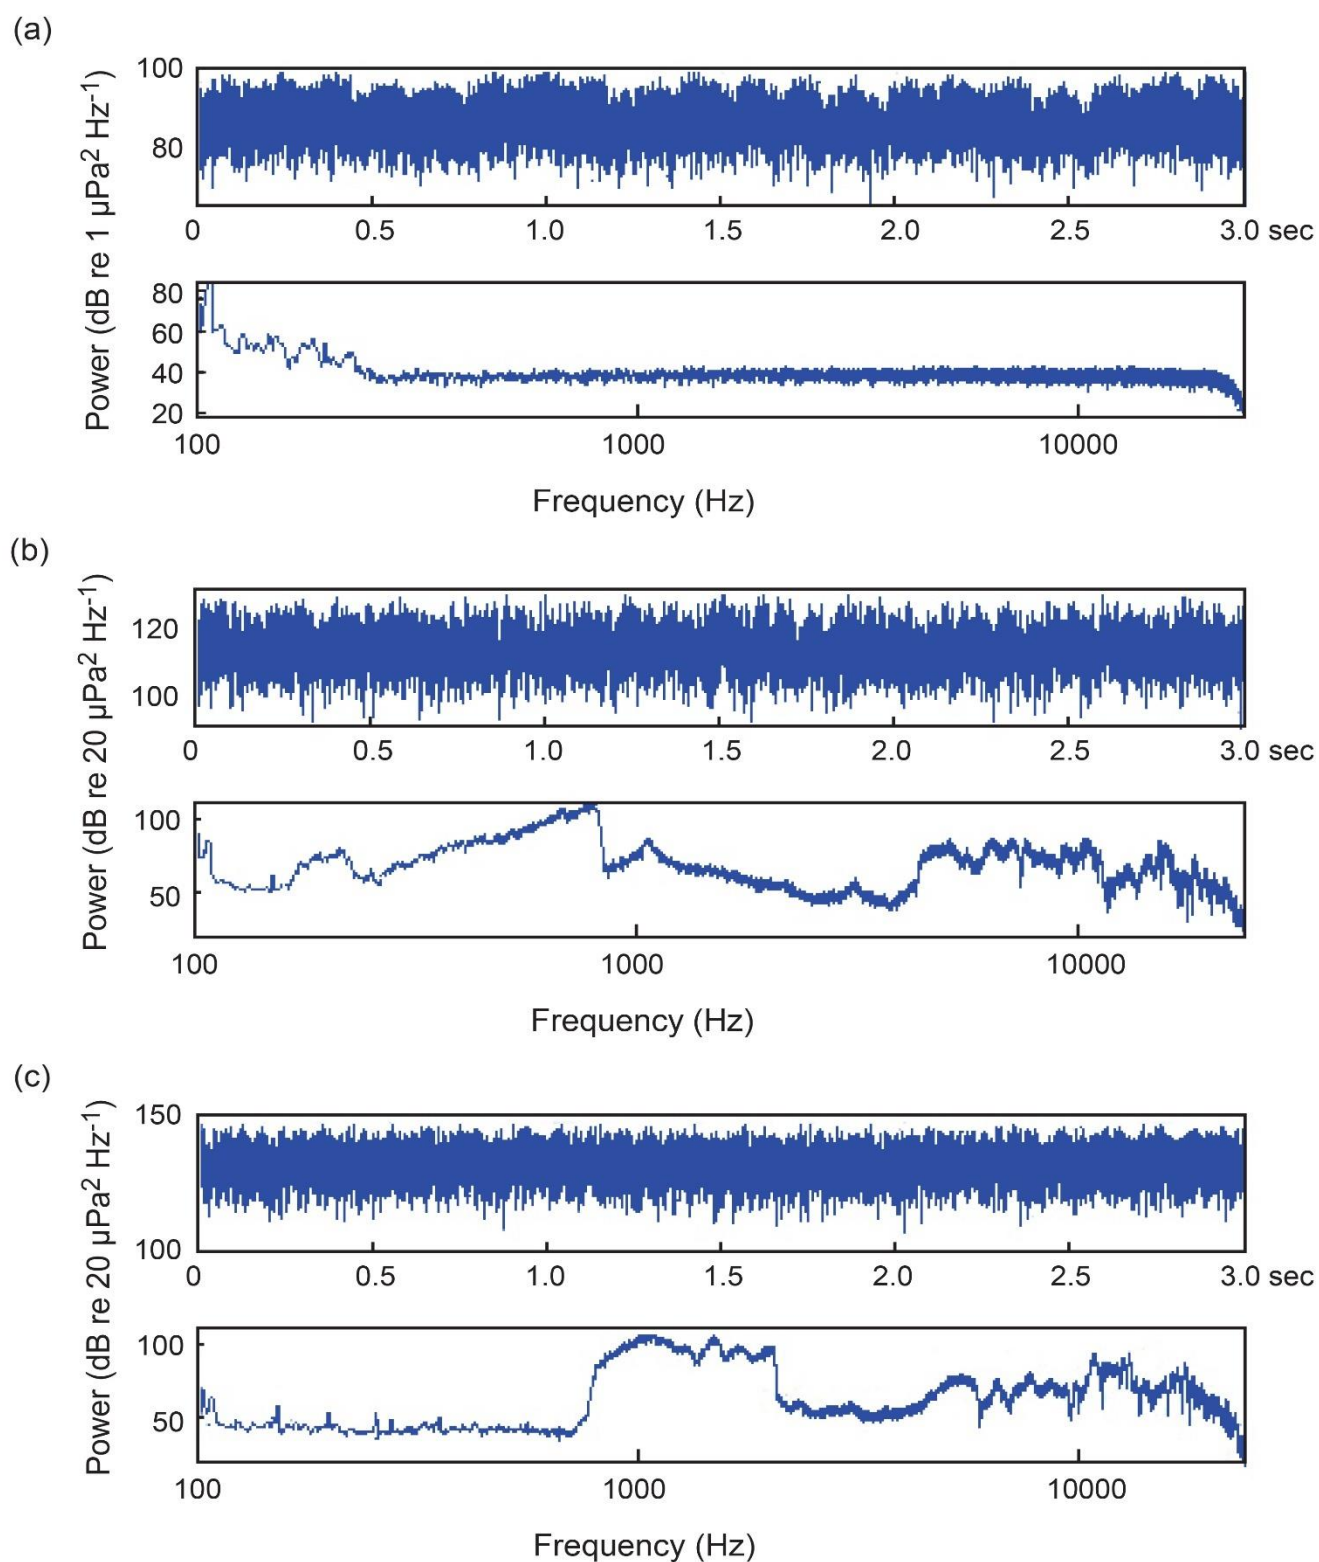

**Figure S1.** The mean intensity levels measured for baseline (background noise 94.55 dB @ 1  $\mu\text{Pa}$  (a); 124.03 dB @ 20  $\mu\text{Pa}$  at 124 Hz (b); 140.01 dB @ 20  $\mu\text{Pa}$  at 800–2000 Hz (c).
